# Supplementary material
Source: PubMed Central journal article supplement (PMC4418540)
Supplement: NIHMS680756-supplement-01.pdf [file NIHMS680756-supplement-01.pdf]

**Journal of Biological Rhythms**

**Supplementary Online Material**

**Temporal dynamics of ocular indicators of sleepiness across sleep restriction**

Suzanne Ftouni, Shadab A. Rahman, Kate E. Crowley, Clare Anderson,  
Shantha M.W. Rajaratnam, Steven W. Lockley

Supplementary Online Figure S1

Supplementary Online Figure S2

Supplementary Online Table S1

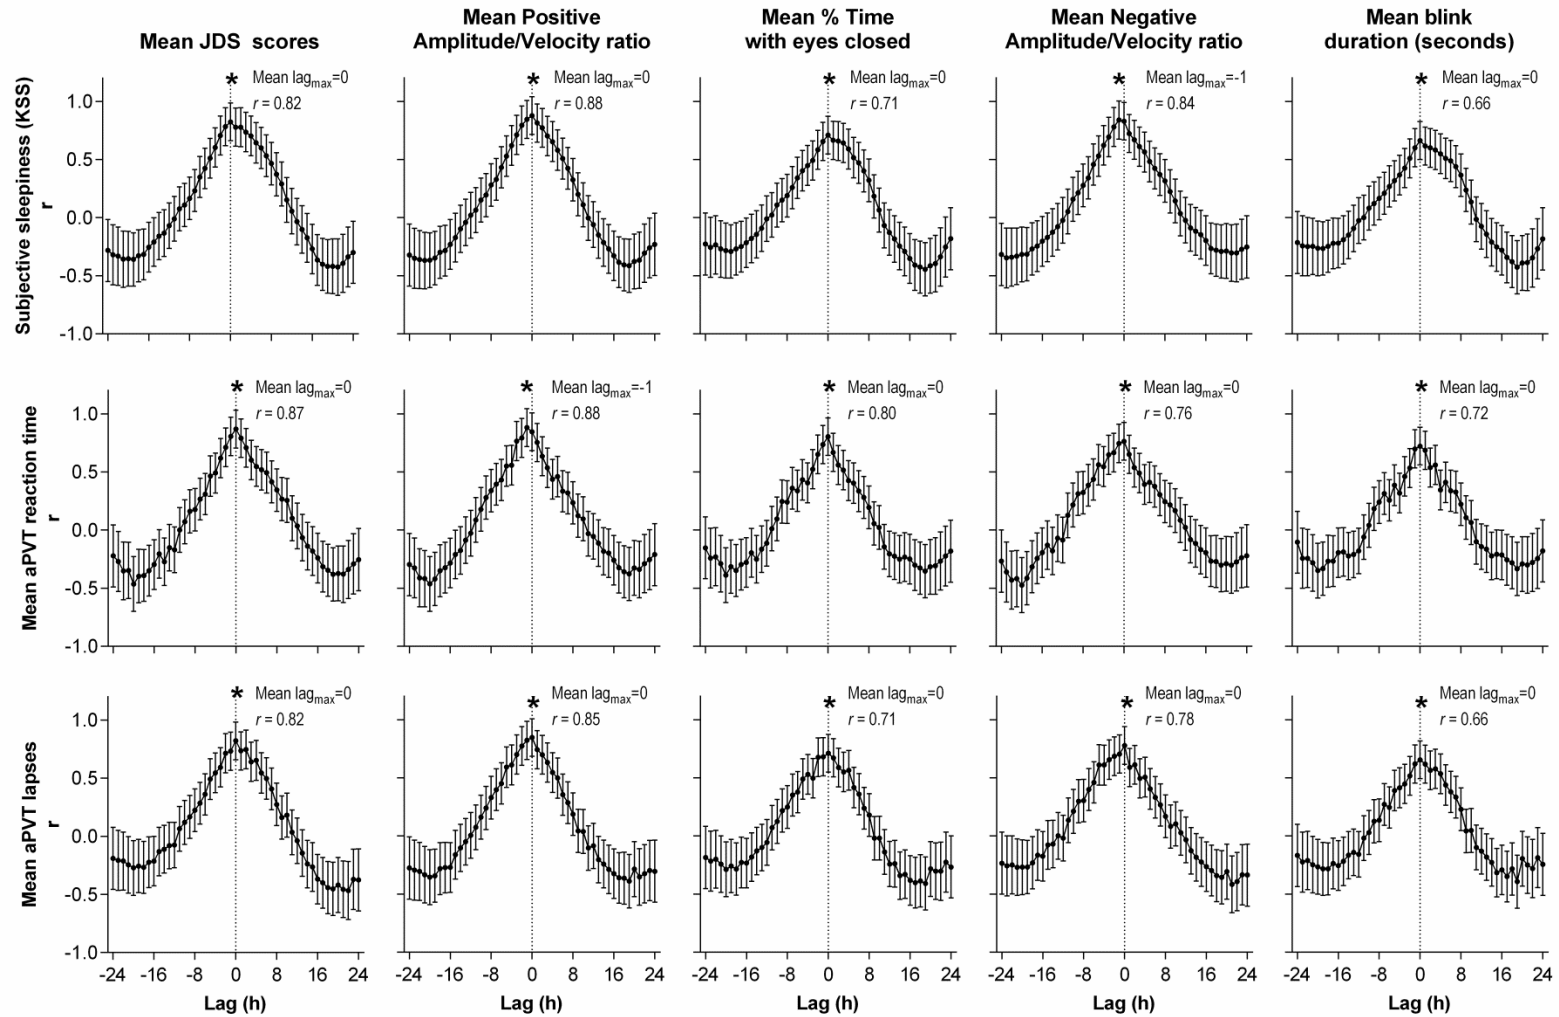

**Figure S1.** Cross-correlations between subjective sleepiness, mean aPVT reaction time and lapses, and ocular measures. \*Mean lag<sub>max</sub> correlation coefficients significant to  $p < 0.05$ . aPVT = Auditory Psychomotor Vigilance Task, KSS = Karolinska Sleepiness Scale, JDS = Johns Drowsiness Scale

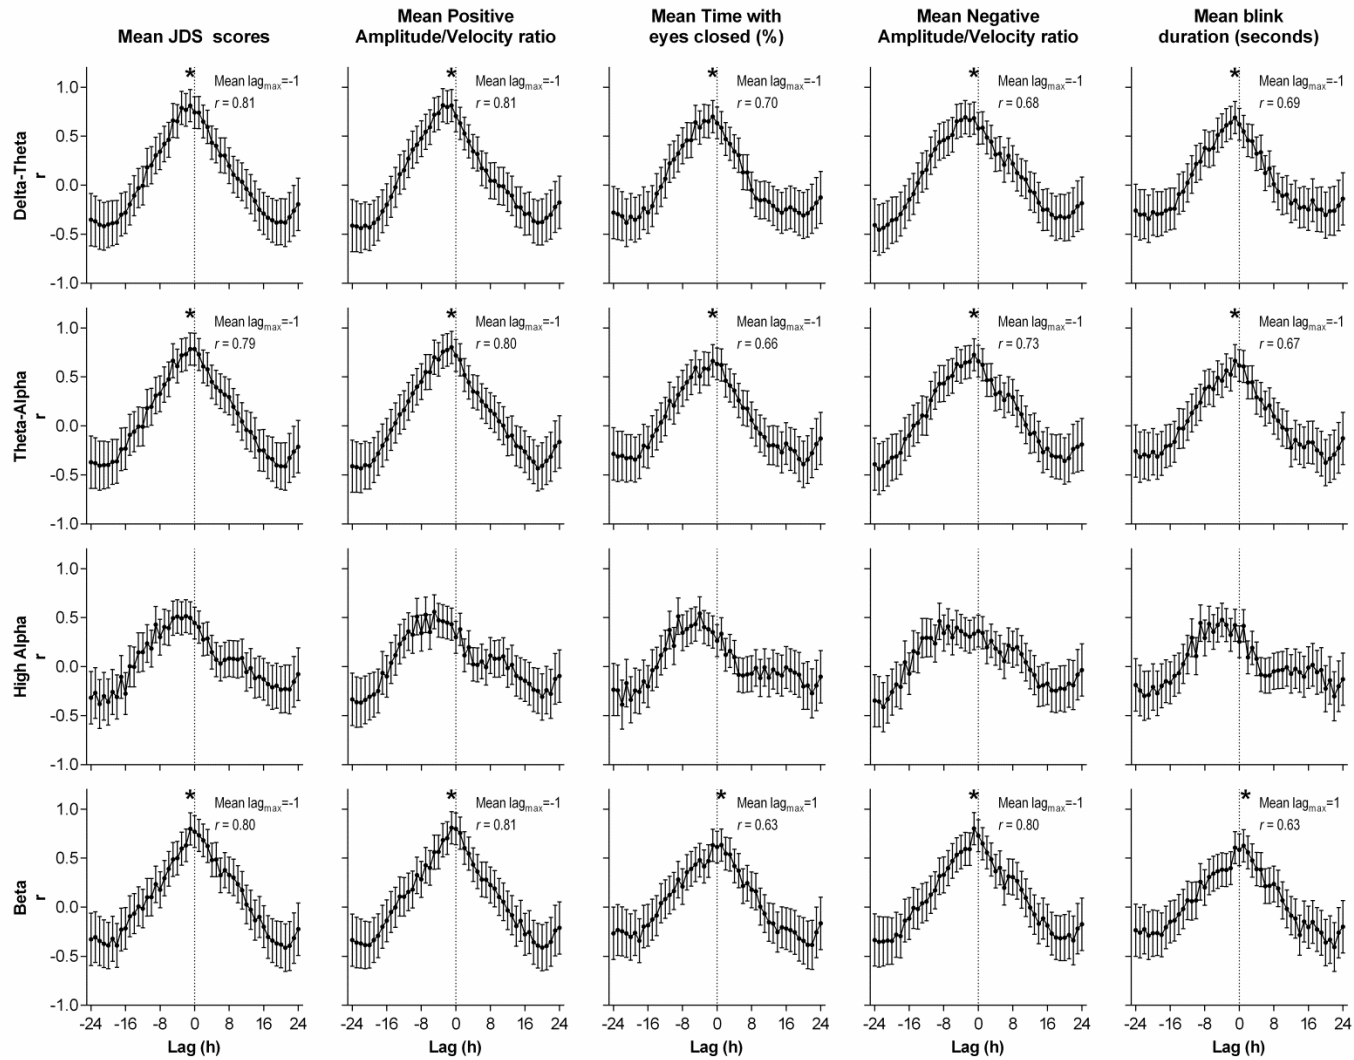

**Figure S2.** Cross-correlations between EEG power densities and ocular measures. \* Mean lag<sub>max</sub> Correlation coefficients significant to  $p < 0.05$ . JDS = Johns Drowsiness Scale

**Table S1.** ROC AUC of ocular measures and subjective sleepiness predicting performance lapses.

| Measure              | AUC $\pm$ SE    | Cut off | Sensitivity<br>(95% CI) | Specificity<br>(95% CI) | $\chi^2$    | <i>p</i>    |
|----------------------|-----------------|---------|-------------------------|-------------------------|-------------|-------------|
| <i>25% threshold</i> |                 |         |                         |                         |             |             |
| KSS                  | 0.74 $\pm$ 0.03 | 6.50    | 80.9 (73.1 - 87.7)      | 63.7 (57.6 - 69.5)      | -           | -           |
| Mean JDS             | 0.74 $\pm$ 0.03 | 4.20    | 70.4 (58.4 - 80.7)      | 65.7 (59.4 - 71.7)      | 0.01        | 0.91        |
| Mean PosAVR          | 0.80 $\pm$ 0.03 | 1.70    | 80.0 (68.7 - 88.6)      | 76.5 (70.6 - 81.7)      | 2.04        | 0.15        |
| Mean %TEC            | 0.68 $\pm$ 0.04 | 4.49    | 65.7 (53.4 - 76.7)      | 61.0 (54.5 - 67.2)      | 2.41        | 0.12        |
| Mean NegAVR          | 0.67 $\pm$ 0.03 | 2.16    | 67.6 (55.5 - 78.2)      | 63.2 (56.8 - 69.3)      | 3.04        | 0.08        |
| Mean BD              | 0.75 $\pm$ 0.04 | 620     | 70.0 (57.9 - 80.4)      | 68.5 (62.2 - 74.3)      | 0.08        | 0.78        |
| <i>50% threshold</i> |                 |         |                         |                         |             |             |
| KSS                  | 0.72 $\pm$ 0.03 | 6.50    | 80.3 (70.3 - 86.8)      | 62.2 (56.2 - 67.9)      | -           | -           |
| Mean JDS             | 0.76 $\pm$ 0.03 | 4.20    | 71.4 (58.7 - 82.1)      | 64.8 (58.5 - 70.7)      | 0.73        | 0.39        |
| Mean PosAVR          | 0.82 $\pm$ 0.03 | 1.71    | 80.7 (68.6 - 89.6)      | 76.0 (70.2 - 81.2)      | <b>5.83</b> | <b>0.02</b> |
| Mean %TEC            | 0.69 $\pm$ 0.04 | 4.45    | 67.7 (54.7 - 79.1)      | 60.2 (53.9 - 66.4)      | 0.69        | 0.40        |
| Mean NegAVR          | 0.70 $\pm$ 0.03 | 2.16    | 69.8 (57.0 - 80.8)      | 62.8 (56.5 - 68.8)      | 0.42        | 0.52        |
| Mean BD              | 0.77 $\pm$ 0.04 | 657.7   | 71.0 (58.1 - 81.8)      | 70.7 (64.6 - 76.3)      | 1.13        | 0.29        |
| <i>75% threshold</i> |                 |         |                         |                         |             |             |
| KSS                  | 0.71 $\pm$ 0.03 | 6.5     | 79.0 (70.0 - 86.1)      | 61.1 (55.1 - 66.8)      | -           | -           |
| Mean JDS             | 0.74 $\pm$ 0.03 | 4.29    | 67.8 (54.4 - 73.4)      | 66.5 (60.4 - 72.3)      | 0.58        | 0.45        |
| Mean PosAVR          | 0.81 $\pm$ 0.03 | 1.70    | 81.0 (68.6 - 90.1)      | 74.0 (68.2 - 79.3)      | <b>5.65</b> | <b>0.02</b> |
| Mean %TEC            | 0.67 $\pm$ 0.04 | 4.65    | 63.8 (50.1 - 76.0)      | 60.1 (53.8 - 66.2)      | 0.50        | 0.48        |
| Mean NegAVR          | 0.69 $\pm$ 0.03 | 2.16    | 69.5 (56.1 - 80.8)      | 62.2 (55.9 - 68.2)      | 0.09        | 0.77        |
| Mean BD              | 0.75 $\pm$ 0.04 | 615     | 70.7 (57.3 - 81.9)      | 66.0 (59.8 - 71.8)      | 1.01        | 0.31        |

AUC, Area Under the Curve; JDS, Johns Drowsiness Scale; PosAVR, Positive Amplitude/Velocity Ratio; NegAVR, Negative Amplitude/Velocity Ratio; %TEC, percentage of time spent with eyes closed; BD, Blink duration; CI, Confidence Intervals. For each pairwise comparison, the  $\chi^2$  statistic is shown, bolded values indicate significant difference compared to KSS.
